1 **Effects of Perinatal Fluoxetine Exposure on Novelty-induced Social and Non-Social**  
2 **Investigation Behaviors in a Seminatural Environment**

3

4 Ole Christian Sylte<sup>1,\*</sup>, Jesper Solheim Johansen<sup>1,\*</sup>, Indrek Heinla<sup>1</sup>, Danielle J Houwing<sup>1,2</sup>,  
5 Jocelien DA Olivier<sup>2</sup>, Roy Heijkoop<sup>1</sup>, and Eelke MS Snoeren<sup>1,3</sup>

6 <sup>1</sup> Department of Psychology, UiT the Arctic University of Norway, Norway

7 <sup>2</sup> Department of Neurobiology, Groningen Institute for Evolutionary Life Sciences, University  
8 of Groningen, the Netherlands

9 <sup>3</sup> Regional Health Authority of North Norway

10

11 \* These authors contributed equally.

12

13

14

15

16

17

18

19

20

21

22 Corresponding concerning this article should addressed to Eelke Snoeren, Department of  
23 Psychology, UiT the Arctic University of Norway, 9037 Tromsø, Norway. E-mail address:  
24 [eelke.snoeren@uit.no](mailto:eelke.snoeren@uit.no)

25 **Abstract**

26 Selective serotonin reuptake inhibitors (SSRIs) are increasingly prescribed as medication for  
27 various affective disorders during pregnancy. SSRIs cross the placenta and affect serotonergic  
28 neurotransmission in the fetus, but the neurobehavioral consequences for the offspring remain  
29 largely unclear. Recent rodent research has linked perinatal SSRI exposure to alterations in  
30 both social and non-social aspects of behavior. However, this research has mainly focused on  
31 behavior within simplified environments. The current study investigates the effects of  
32 perinatal SSRI exposure on social and non-social investigation behaviors of adult rat  
33 offspring upon introduction to a novel seminatural environment with unknown conspecifics.  
34 During the perinatal period (gestational day 1 until postnatal day 21), rat dams received daily  
35 treatment with either an SSRI (fluoxetine, 10 mg/kg) or vehicle. Adult male and female  
36 offspring were observed within the first hour after introduction to a seminatural environment.  
37 The results showed that perinatal fluoxetine exposure altered aspects of non-social  
38 investigation behaviors, while not altering social investigation behaviors. More specific, both  
39 fluoxetine exposed males and females spent more total time on locomotor activity than  
40 controls. Furthermore, fluoxetine exposed females spent less time exploring objects and  
41 specific elements in the environment. The data suggest that perinatal exposure to SSRIs leads  
42 to a quicker, less detailed investigation strategy in novel environments, and that the alteration  
43 is mostly pronounced in females.

44

45

46

47 *Keywords:* antidepressants, fluoxetine, perinatal, behavior, social, rats, seminatural

48 environment, SSRI

49 **1. Introduction**

50 A considerable number of women experience depression or other mental disorders  
51 during pregnancy. Approximately 1 in 10 pregnant women fulfill the DSM-5 diagnostic  
52 criteria for major depressive disorder (Bennett et al., 2004; Woody et al., 2017). In treatment  
53 of maternal depression and anxiety, selective serotonin reuptake inhibitors (SSRIs) are the  
54 most frequently prescribed class of drugs, as it has been considered relatively safe for both  
55 mother and child. The prescription rate of SSRIs to pregnant women has increased  
56 tremendously in the last decades (Mitchell et al., 2011), and recent estimates suggest a  
57 worldwide prevalence of 3% (Molenaar et al., 2020) with significant geographically  
58 differences (Andrade et al., 2008; Charlton et al., 2015). Consequently, hundreds of thousands  
59 of babies exposed to SSRIs during early development are born every year. Despite the  
60 widespread use, we have limited knowledge on whether SSRI exposure during the early  
61 stages of brain development can lead to altered long-term behavioral outcomes, such as social  
62 and non-social behaviors.

63 Antidepressants, such as SSRIs, reach the fetus by crossing the placenta and are  
64 present in breast milk (Kristensen et al., 1999; Rampono et al., 2004). Thus, children can  
65 potentially be exposed to SSRIs during the entire perinatal period (Kim et al., 2006;  
66 Noorlander et al., 2008). SSRIs inhibit the function of the serotonin-reuptake transporter  
67 (SERT or 5-HTT), which leads to an accumulation of 5-HT in the synaptic cleft. This in turn  
68 increases the magnitude and duration of 5-HT activity at pre- and post-synaptic 5-HT  
69 receptors. In the adult brain, 5-HT acts mainly as a modulatory neurotransmitter, regulating  
70 emotion, cognition, sleep and stress responses (Olivier et al., 2011a). However, in the  
71 developing brain, 5-HT is widespread and acts as a neurotrophic factor regulating cell  
72 division, differentiation, migration, and synaptogenesis (Azmitia, 2001; Gaspar et al., 2003).

73 Consequently, developmental SSRI exposure is suggested to affect both neurodevelopment  
74 and later-life behaviors (Muller et al., 2016).

75 Previous studies in humans have shown associations between developmental SSRI  
76 exposure and impaired social behavior (Klinger et al., 2011), increased risk of speech and  
77 language disorders (Brown et al., 2016), and elevated levels of internalizing behavior, like  
78 anxiety and depression (Hermansen et al., 2016; Lupattelli et al., 2018; Malm et al., 2016).

79 While the existing literature has mainly examined the childhood years, little is known on  
80 whether these associations persist into adulthood. In addition, outcomes such as depression  
81 may not emerge before a certain age and could therefore remain undiscovered.

82 Epidemiological research on humans, like the above-mentioned studies, are  
83 correlational in nature, and do not necessarily imply causation. A frequent problem with  
84 human studies is the difficulty to isolate the effects of SSRI exposure from the effects of  
85 maternal mental health. Women using SSRIs during pregnancy are likely suffering from  
86 depression, which itself has been shown to have negative impact on the offspring (Dunkel  
87 Schetter, 2011; El Marroun et al., 2014; Goodman, 2007). Animal research, on the other hand,  
88 allows to control for potential interference from confounding factors, like maternal health,  
89 drug dose and timing of exposure. As rodent and human serotonergic development is  
90 remarkably similar (Glover and Clinton, 2016), rodent studies can provide valuable  
91 translational insight about how developmental SSRI exposure affects human offspring.

92 Rodent studies investigating the effects of developmental exposure to SSRIs have  
93 reported alterations in different social and non-social behaviors in the offspring. In juvenile  
94 male and female offspring, both pre- and post-natal SSRI exposure have been shown to  
95 decrease social play behavior (Houwing et al., 2019b; Khatri et al., 2014; Olivier et al.,  
96 2011b; Rodriguez-Porcel et al., 2011; Simpson et al., 2011). Similar tendencies have been

97 found in adult rats with developmental SSRI exposure leading to less social interactions  
98 (Olivier et al., 2011b; Rodriguez-Porcel et al., 2011), or decreased interest to explore a novel  
99 conspecific (Khatri et al., 2014; Rodriguez-Porcel et al., 2011; Simpson et al., 2011;  
100 Zimmerberg and Germeyan, 2015). SSRI exposure can also decrease (Houwing et al., 2020),  
101 or increase (Gemmel et al., 2017; Kiryanova and Dyck, 2014; Svirsky et al., 2016),  
102 aggressive-like social behaviors. Furthermore, a recent meta-analysis revealed that  
103 developmental exposure to SSRI was linked to reduced activity and explorative behaviors in  
104 adult rats and mice (Ramsteijn et al., 2020).

105         Most of the animal studies, however, have used simplified rodent test set-ups which  
106 only investigates a small fraction of all behaviors. Furthermore, these studies do not account  
107 for the environmental and social complexity of real-world situations. To bypass these  
108 limitations, recent studies from our research group have employed a seminatural environment  
109 enabling rats to express all aspects of their natural behaviors (Hegstad et al., 2020; Heinla et  
110 al., 2020; Houwing et al., 2019a). These studies showed that perinatal SSRI fluoxetine (FLX)  
111 exposure leads to various alterations in social and non-social behaviors in a naturalistic  
112 setting. More specifically, perinatal fluoxetine exposure was associated with an increased  
113 amount of passive social behaviors in both males and females, but a reduction of active social  
114 behavior, general activity (Houwing et al., 2019a), and pro-social behaviors in females  
115 (Heinla et al., 2020). Interestingly, these studies were performed in the seminatural  
116 environment *after* the rats were familiarized to each other and the physical environment. It is  
117 currently unknown how social and non-social behaviors manifest directly after introduction to  
118 a novel environment with unfamiliar conspecifics. As perinatal SSRI exposure seem to alter  
119 stress-coping behaviors (Houwing et al., 2019a), one could hypothesize that the stressor of a

120 novel environment with new conspecifics could lead to more pronounced changes in social  
121 and non-social behaviors.

122         The aim of the current study was to investigate if perinatal SSRI exposure alters social  
123 and non-social investigation behaviors in a novel environment with unknown conspecifics.  
124 We define investigation as behaviors that provides the animal with information about a novel  
125 stimulus. More specifically, social investigation refers to when the stimulus investigated is a  
126 conspecific, such as when sniffing and grooming others, while non-social investigation refers  
127 to investigation of inanimate objects and environmental locations. In line with previous  
128 studies (Heinla et al., 2020; Houwing et al., 2019a), we expected perinatal fluoxetine  
129 exposure to show a reduction in active social behavior in in non-social investigation  
130 (exploratory) behavior in the initial phase of the introduction to the seminatural environment.  
131 In addition, as introduction to a new environment can be considered a stressful situation, we  
132 also expected to observe an increase in self-grooming behavior in FLX-exposed animals.

133

## 134 **2. Material and Methods**

135         The data was collected from video recordings obtained in a previously performed  
136 experiment (Houwing et al., 2019a). The materials and methods are therefore similar to those  
137 described previously (Hegstad et al., 2020; Heinla et al., 2020; Houwing et al., 2019a).  
138 However, the behavioral scoring scheme was uniquely formed to the current study.

139

### 140 **2.1 Animals and dam housing**

141         A total of 20 Wistar rats (10 males, 10 females), weighing 200-250 grams on arrival,  
142 were obtained from Charles River (Sulzfeld, Germany) for breeding. After arrival, same-sex  
143 pairs were housed in Makrolon IV cages (60 x 38 x 20 cm) on a reversed 12:12 hours

144 light/dark cycle, in which the lights were turned on at 23.00. Temperature in the room was 21  
145  $\pm 1^\circ\text{C}$ , and the relative humidity was  $55 \pm 10\%$ . Standard rodent food pellets (standard chow,  
146 Special Diets Services, Witham, Essex, UK), water and nesting material were available ad  
147 libitum. Animal care and experimental procedures were conducted in agreement with  
148 European Union council directive 2010/63/EU. The protocol was approved by the National  
149 Animal Research Authority in Norway.

150

## 151 **2.2 Breeding and antidepressant treatment**

152 Daily, all females were checked for sexual receptivity by placing them together with a  
153 male rat for 5 minutes. When lordosis behavior was observed, they were considered in  
154 proestrus and thus ready for breeding. The female then got placed together with a male in an  
155 isolated Makrolon IV cage for the next 24 hours (gestational day 0). Afterwards, they returned  
156 to their initial same-sex pairs for the first two weeks of pregnancy. From gestational day 14,  
157 the females were placed solitarily until delivery (gestational day 21/postnatal day 0).

158 During the 6-week period from conception (gestational day 0) to weaning (postnatal  
159 day 21), females received either the SSRI fluoxetine 10 mg/kg (Apotekproduksjon, Oslo,  
160 Norway) or vehicle (methylcellulose; Sigma, St. Louis, MO, USA) daily by oral gavage. The  
161 offspring were thus exposed to perinatal fluoxetine via the treatment of the dams (in utero and  
162 via breast feeding). The fluoxetine treatment was prepared with tablets for human usage that  
163 were pulverized and dissolved in sterile water (2mg/mL) and injected at a volume of 5mL/kg.  
164 Methylcellulose powder, the non-active filling of a fluoxetine tablet, was used as control  
165 condition. The powder was dissolved in sterile water to create a 1% solution and administered  
166 at a volume of 5mL/kg as well. Every third day, females were weighed to ensure correct  
167 dosage of fluoxetine/vehicle. The chosen dosage of fluoxetine was decided upon comparison

168 of fluoxetine blood levels of humans and animals (Lundmark et al., 2001; Olivier et al.,  
169 2011b). When the rat dams got close to the end of pregnancy, they were checked two times a  
170 day (09.00 and 15.00) for delivery.

171

### 172 **2.3 Offspring housing**

173       The offspring were housed together with their mothers until weaning (gestational day  
174 21). After weaning, groups of two or three same-sex littermates were housed together in  
175 Makrolon IV cages (see cage distribution in the supplemental materials). They were left  
176 undisturbed, except for the ovariectomy (see section for Procedure) and weekly cage cleaning,  
177 until introduction to the seminatural environment at the age of 13-18 weeks. To enable  
178 individual recognition, ears were punched. In Figure 1, a schematic overview shows all  
179 experimental procedures from gestational day 0 to the end of the experiment.

180

181

182

183

184

185

186

187

188

189

190

191



192 **Figure 1 Overview of experimental procedures**

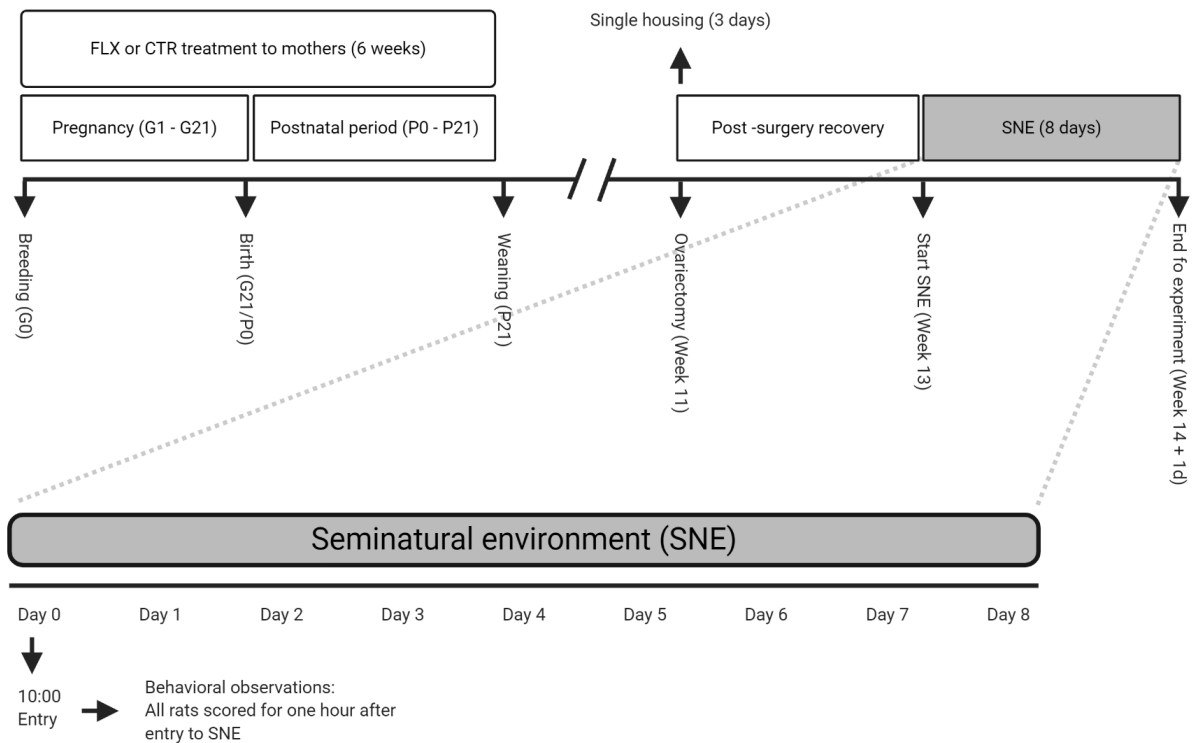

193

194 *Figure 1. FLX = fluoxetine, CTR = control, P = postnatal day, G = gestational day. Created*  
195 *with BioRender (<https://biorender.com/>).*

196

197 **2.4 Seminatural environment**

198 The seminatural environment (SNE; 240 x 210 x 75 cm) consisted of two parts: an  
199 open area and a burrow system (Figure 2; (Chu and Agmo, 2014; Houwing et al., 2019a;  
200 Snoeren et al., 2015)). Four openings (8 x 8 cm) connected the two areas. In the open area,  
201 two partitions (40 x 75 cm) simulated natural obstacles. The burrow system consisted of  
202 connected tunnels (width 7.6 cm, height 8 cm) and four nest boxes (20 x 20 x 20 cm).  
203 Plexiglas covered the burrow at the height of 75 cm, while the open area remained open. A  
204 curtain between the two parts allowed for different light settings. The burrow was left dark the  
205 entire time. In the open area, on the other hand, light settings simulated a day-night cycle. A

206 lamp located 2,5 m above the floor, simulated daylight (180 lux) between 22.45 and 10.30.  
207 From 10.30 to 11.00 the lights gradually decreased to 1 lux (simulating moonlight). The  
208 darkness lasted until the light gradually increased from 1 to 180 lux between 22.15 and 22.45.

209 The whole ground of the SNE was covered with a layer (2 cm) of aspen wood chip  
210 bedding (Tapvei, Harjumaa, Estonia). The nest boxes had 6 squares of nesting material in  
211 each (non-woven hemp fibers, 5 x 5 fibers, 5 mm thickness, Datesend, Manchester, UK).  
212 Three plastic shelters (15 x 16.5 x 8.5 cm, Datesend, Manchester, UK) were placed in the  
213 open area. Additionally, 12 aspen wooden sticks (2 x 2 x 10 cm, Tapvei, Harjumaa, Estonia)  
214 were randomly placed around in the SNE. A pile of food pellets (approx. 2 kg) and four  
215 bottles of water were available at all time (see location in Figure 2A).

216 Two video cameras (Basler) were mounted on the ceiling, 2 m above the open area  
217 (regular camera) and the burrow system (infrared camera) respectively. Media Recorder 2.5  
218 was employed for video recordings. The data got immediately stored on an external hard  
219 drive. The recording was manually stopped and restarted every 24 hours. The purpose was to  
220 ensure that eventual errors only would affect one day of recorded data.

221

222

223

224

225

226

227

228

229

230 **Figure 2 The Seminatural Environment**

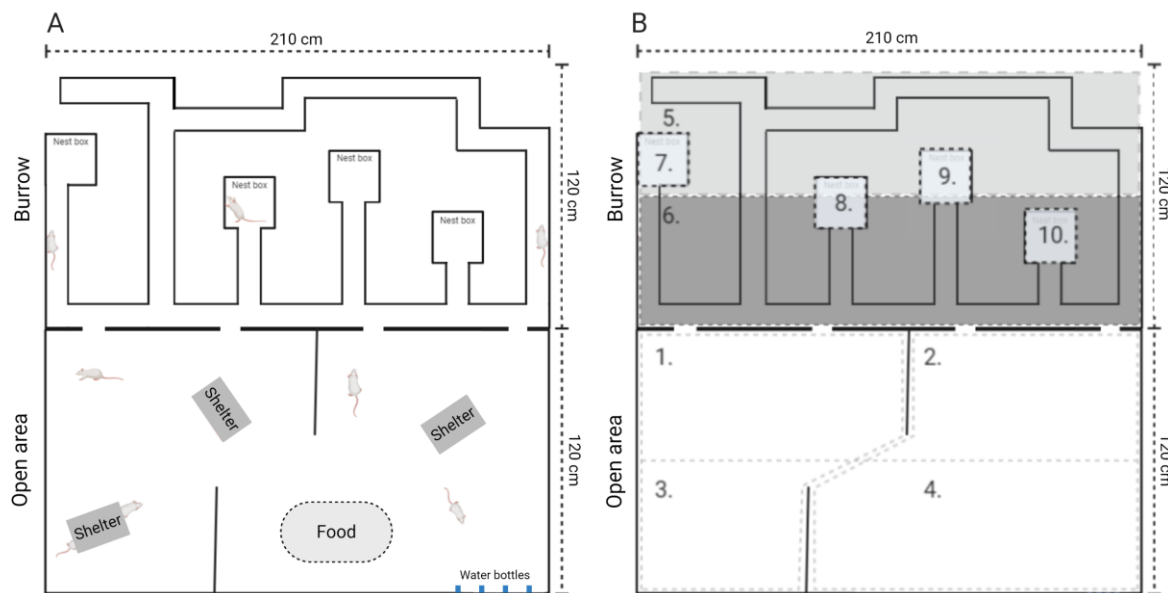

231

232 *Figure 2. Illustration of the whole seminatural environment (A) and sectioning of the different*

233 *locations (B). 1 = open area close to burrow left, 2 = open area close to burrow right, 3 =*

234 *open area far away from burrow left, 4 = open area far away from burrow right, 5 = tunnels*

235 *far away from open a, 6 = tunnels close to OA, 7 = nestbox left, 8 = nestbox mid-left, 9 =*

236 *nestbox mid-right, 10 = nestbox right. Created with BioRender (<https://biorender.com/>).*

237

238 **2.5 Design of the study**

239 Initially, five cohorts, each consisting of eight rat offspring, were placed one at the

240 time in the SNE. However, one day of video material was lost due to recording error, which

241 reduced the number of cohorts to four. A cohort consisted of 4 males and 4 females of which

242 each sex constituted 2 controls (CTR) and 2 fluoxetine (FLX) rats. Thus, data from this

243 experiment came from 8 CTR-males, 8 CTR-females, 8 FLX-males and 8 FLX-females (see

244 Table S2 for more details). Within a cohort, same sex rats came from different litters and were

245 thus unfamiliar to each other. Some rats had one sibling from the opposite sex in the same  
246 cohort. However, these rats had been housed in different home cages since weaning.

247

## 248 **2.6 Procedure**

249 For the purpose of a previous study (Houwing et al., 2019a), the female offspring were  
250 ovariectomized two weeks before entering the SNE in order to control their estrous cycle.

251 Although irrelevant for the objective of the current study, this procedure had the effect of  
252 keeping the females in diestrus of the menstrual cycle during the observation period. Before  
253 entering the SNE, the rats were shaved on the back and tail-marked under isoflurane  
254 anesthesia for individual recognition (for more details, see (Houwing et al., 2019a)). All rats  
255 were also weighed, confirming that there was no weight difference between CTR- and FLX-  
256 rats.

257 Each cohort was placed in the SNE for 8 days. See Figure 1 for an overview of the  
258 whole procedure. The cohorts were introduced to SNE on the first day (day 0) at 10.00 and  
259 removed on day 8 at the same time. However, only data from the first hour was used for the  
260 purpose of this study. All rats were again weighed after being removed from the SNE. No  
261 difference in weight was observed between CTR- and FLX-rats. In order to remove olfactory  
262 cues, the SNE was cleaned and bedding changed between cohorts.

263

## 264 **2.7 Behavioral observations**

265 The frequency and/or duration of several behaviors (see Table 1) were scored  
266 manually using The Observer XT, version 12 (Noldus, Wageningen, The Netherlands). Two  
267 observers, blinded for the animal treatment, independently scored either males or females  
268 across all four cohorts. In addition to behavior, (1) location of the animal (see Figure 2B), (2)

269 whether the animal initiated the respective behavior or was respondent to it, (3) whether the  
270 animal was in physical contact with another animal or not during the respective behavior, and  
271 lastly, (4) ID of the interacting partner was scored. Since we were interested in observing how  
272 the rats behaved in a novel environment with unfamiliar conspecifics, all rats were scored in  
273 the first 60 minutes after entry to the SNE.

274

275 **Table 1 Description of recorded behaviors**

| Behavior                  | Description                                                                                                       |
|---------------------------|-------------------------------------------------------------------------------------------------------------------|
| Walking/running           | Walking or running through the environment                                                                        |
| Chasing                   | Running forward in the direction of a conspecific                                                                 |
| Non-social exploration    | Exploring the environment by sniffing, usually when slowly walking or sitting still                               |
| Digging                   | Digging, pushing or carrying bedding/nesting/food material                                                        |
| Resting/immobile alone    | Sitting or sleeping with minimal movement of the head without other rats in close vicinity                        |
| Resting/immobile socially | Sitting or sleeping with minimal movement of the head with at least 1 other rat on maximum 1 rat body length away |
| Hiding alone              | Being in the shelter alone                                                                                        |
| Hiding socially           | Being in the shelter with at least one other rat                                                                  |
| Following                 | Walking or running in the same direction as another rat in front.                                                 |
| Allogrooming              | Grooming any part of a conspecific's body, usually on the head or in the neck region                              |
| Sniffing anogenitally     | Sniffing the anogenital region of the conspecific                                                                 |
| Sniffing nose-to-nose     | Sniffing the facial region of the conspecific                                                                     |
| Sniffing body             | Sniffing any part of the conspecifics body, except for the anogenital and facial region                           |
| Fighting                  | Kicking, pouncing, pushing, grappling, boxing or wrestling another rat                                            |
| Nose-off                  | Facing another rat, usually in a tunnel, resulting in one rat moving forward and the other backing up             |
| Self-grooming             | Grooming itself                                                                                                   |
| Freezing                  | Complete absence of movement in addition to a tense body posture                                                  |
| Rearing supported         | Raising itself upright on its hind paws, facing a wall or an object                                               |
| Rearing unsupported       | Raising itself upright on its hind paws, not facing a wall or an object                                           |

276

277 **Table 2 Description of behavioral clusters**

| Cluster                        | Behaviors within clusters                                                     |
|--------------------------------|-------------------------------------------------------------------------------|
| Socially active behaviors      | Sniffing anogenitally, sniffing nose-to-nose, sniffing body, and allogrooming |
| General activity               | Walking/running, non-social exploration                                       |
| Non-socially passive behaviors | Resting alone, hiding alone                                                   |
| Socially passive behaviors     | Hiding socially, resting socially                                             |
| Conflict behaviors             | Nose-off, fighting                                                            |

278

279 **2.8 Data preparation and statistical analysis**

280 As shown in Table 2, the recorded behaviors were combined into behavioral clusters.  
281 For each rat, we calculated the total duration and the number of events for every behavior and  
282 behavioral cluster. This data was later divided into six 10-minute time-bins in order to analyze  
283 behavioral changes over time. Latencies to meet the other rats, and latencies to visit the  
284 different locations of the SNE were also noted. This data was later divided and analyzed  
285 cumulative over the first 1, 3, 5, 10, 20, 30, and 60 minutes. In this study, we operationalized  
286 social investigation behaviors as the cluster “socially active behaviors” and the latencies to  
287 meet all other rats, whereas non-social investigation behaviors were operationalized as the  
288 cluster “general activity” and latencies to visit all the locations (See Figure 2B).

289 Normality of data was determined with Shapiro-Wilks tests. Data with  $p < .05$  was  
290 analyzed non-parametrically. Simple group comparisons were performed with either a student  
291 t-test or the non-parametric Mann-Whitney U test. Repeated measures ANOVA was used  
292 when the behaviors were analyzed over time. In cases the Mauchly’s test indicated violation  
293 of sphericity from the ANOVA output, the degrees of freedom were corrected using  
294 Greenhouse-Geisser estimates of sphericity. To correct for multiple comparisons, the  
295 Benjamini-Hochberg procedure was performed on all significant results together with a  
296 predetermined set of variables (sniffing, self-grooming, non-social exploration, conflict  
297 behaviors). All tests reported were done 2-tailed.

298 **2.9 Statement Open Science Framework (OSF)**

299 The design of our study was preregistered on OSF on the 25th of March 2019  
300 (<https://osf.io/m87j5>). There were no changes in analysis, except that we did not use the  
301 originally planned additional control group. As stated at OSF, the planned control group was  
302 not suitable, because it consisted of aged rats and had a different composition in number of  
303 rats (7 versus 8). We therefore concluded that these differences would make it impossible to  
304 compare the cohorts of the current study.

305

306 **3 Results**

307 From the behavioral scoring, we obtained a lot of data. A complete overview of all  
308 behaviors can be found in Table S3 and S4.

309

310 **3.1 Fluoxetine exposure does not influence social behaviors in a novel environment**

311 We first investigated whether perinatal exposure to fluoxetine (FLX) affects social  
312 behaviors when the animals are habituating to a novel environment. We therefore examined  
313 social investigation behaviors, as in how the rats investigate unknown conspecifics. In  
314 addition, we measured other relevant forms of social behaviors like passive and conflict  
315 behaviors during the first period after introduction.

316

317 **3.1.1 Social investigation behaviors**

318 The data analysis revealed that CTR- and FLX-females did not differ in time spent on  
319 ( $t = -1.04, p = .315, d = -0.52$ , Figure 3A) or number of episodes ( $t = -1.04, p = .318, d = -$   
320  $0.52$ ) performing socially active behaviors. When looking separately at the different  
321 behavioral components constituting the cluster (see Table 2), CTR- and FLX-rats did not

322 differ on any other behavioral components constituting the clusters relevant to social  
323 behaviors (socially active behaviors, socially passive behaviors and conflict behaviors). No  
324 difference was found between CTR- and FLX-males for socially active behaviors in total time  
325 ( $t = 0.95, p = .356, d = 0.48$ , Figure 3D) or on number of episodes ( $t = 0.103, p = .919, d =$   
326  $0.05$ ).

327         Although the treatment groups did not differ in the amount of socially active  
328 behaviors, it could still be the case that the groups had different interest in meeting other rats.  
329 To investigate this possibility, we first looked at the latencies to when the rats had met all  
330 seven other cohort-members. The data analysis showed that there was no significant  
331 difference in latency to meet all cohort-members between CTR- and FLX-rats for females ( $t =$   
332  $0.84, p = .418, d = 0.42$ ) or males ( $U = 24.00, z = -0.84, p = .422, r = -.21$ ). We subsequently  
333 measured how many cohort members the rats had met as a function of time. CTR- and FLX-  
334 rats were compared on cumulative data measured at 1/3/5/10/20/30/60 minutes. For FLX-  
335 females, there were no significant differences in the number of rats met (treatment effect:  
336  $F(1,14) = 0.05, p = .821$ ) or in the pattern of rats met (timepoints x treatment:  $F(1.73, 24.24)$   
337  $= 0.28, p = .725$ ) over time compared to CTR-females (Figure 3G). Similarly, CTR- and  
338 FLX-males did not differ in the number of rats met across all timepoints (treatment effect:  
339  $F(1,14) = 0.49, p = .492$ ) or in the pattern of rats met over time (timepoints x treatment:  
340  $F(2.05, 28.74) = 0.59, p = .563$ , Figure 3H).

341

### 342 **3.1.2 Other social behaviors**

343         We also investigated some other social behaviors, such as socially passive behaviors  
344 and conflict behaviors. No difference was found between CTR- and FLX-females in total time  
345 ( $U = 33.00, z = 1.05, p = 1, r = .03$ , Figure 3B) or number of episodes being socially passive ( $t$



FLUOXETINE EXPOSURE AND INVESTIGATION BEHAVIORS

17

346 = -0.28,  $p = .784$ ,  $d = -0.14$ ). Furthermore, CTR- and FLX-females spent a similar amount of  
347 time ( $t = 0.03$ ,  $p = .978$ ,  $d = 0.01$ , Figure 3C) and episodes ( $t = -0.40$ ,  $p = .692$ ,  $d = -0.20$ ) in  
348 conflict with other rats. Similarly, for males, no differences were found for time spent on  
349 social passive behavior ( $U = 41.00$ ,  $z = 0.95$ ,  $p = .382$ ,  $r = .24$ , Figure 3E), episodes of social  
350 passive behavior ( $t = 1.48$ ,  $p = .161$ ,  $d = 0.74$ ), time spent on conflict behavior ( $t = -0.03$ ,  $p =$   
351  $.655$ ,  $d = -0.02$ , Figure 3F), or episodes in conflict behavior ( $U = 42.00$ ,  $z = 1.05$ ,  $p = .786$ ,  $r =$   
352  $.26$ ).

353

354

355

356

357

358

359

360

361

362

363

364

365

366

367 **Figure 3 Social behaviors in females and males**

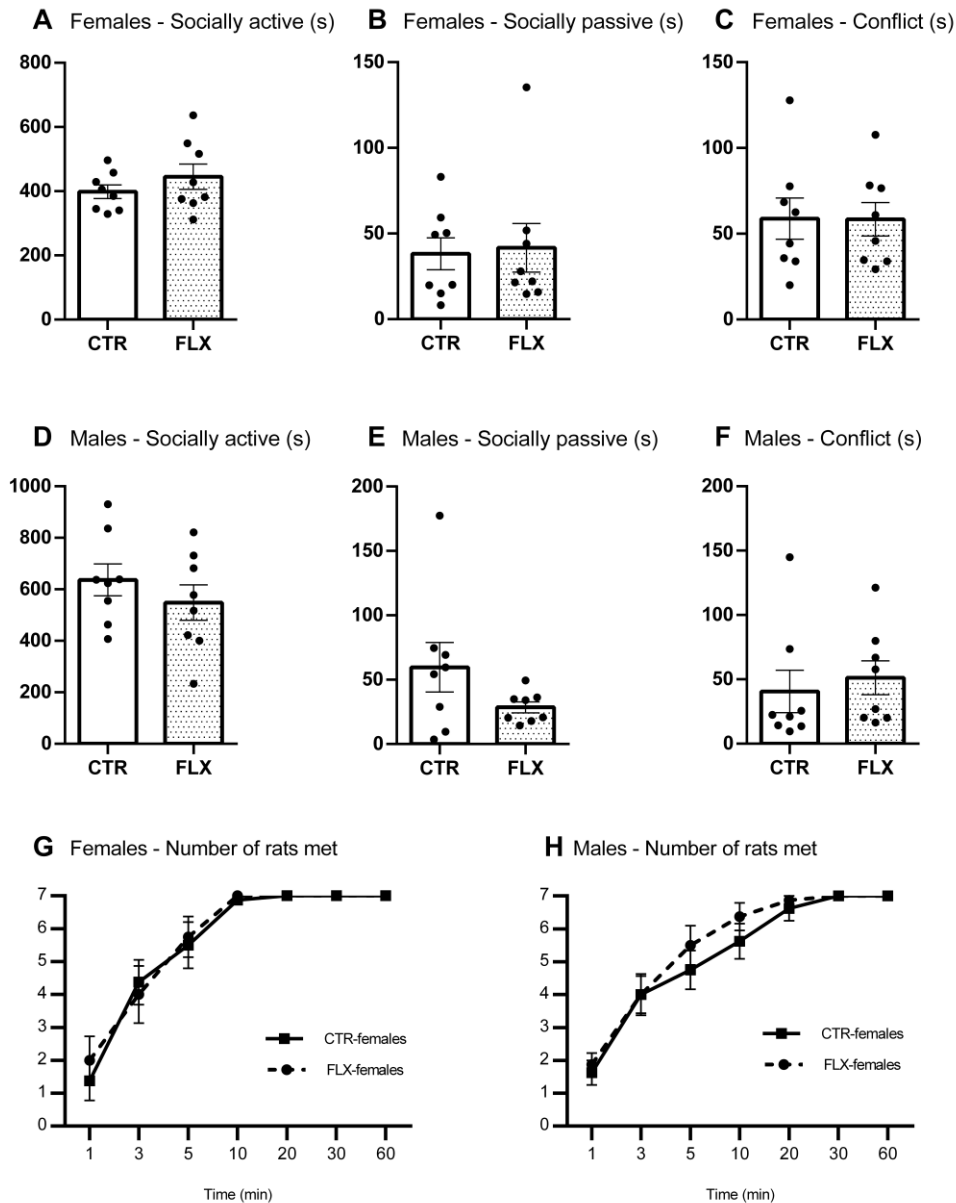

368

369 *Figure 3. The data represent the time spent (s) on socially active behaviors (A, D), socially*  
370 *passive behaviors (B, E), conflict behaviors (C, F), and the total number of rats met over time*  
371 *(G, H). All graphs show comparisons between CTR-females (n = 8) and FLX-females (n = 8)*  
372 *or between CTR-males (n = 8) and FLX-males (n = 8). Data are shown with individual data*  
373 *points with bars representing the group means (A-F), or with squares and circles*  
374 *representing respective group means (G-H). Error bars are representing SEM.*

375 **3.2 Fluoxetine exposure influence how the animals investigate a novel environment**

376 We next investigated whether perinatal fluoxetine exposure alters non-social  
377 investigation behaviors: how the animals investigate objects and the physical environment.  
378 We also examined other relevant non-social behaviors, like passive and anxiety/stress-related  
379 behavior, during the first hour after introduction to the environment.

380

381 **3.2.1 Non-social investigation behaviors**

382 CTR- and FLX-females did not differ in time spent on ( $t = -1.04, p = .311, d = 0.31,$   
383 Figure 4A) or in the number of episodes of general activity ( $t = -1.82, p = .090, d = -0.91$ ).  
384 However, FLX-females were found to spend significantly *more* time walking/running ( $U =$   
385  $56.00, z = 2.52, p = .025, r = .63,$  Figure 4B) but *less* time on non-social exploration ( $U =$   
386  $8.00, z = -2.52, p = .025, r = -.63,$  Figure 4C) compared to CTR-females. FLX-females were  
387 also found to have more episodes of walking/running compared to CTR-females ( $t = -4.29, p$   
388  $= .005, d = -2.15$ ). CTR- and FLX-females did not differ in the number of non-social  
389 exploration episodes ( $t = -0.54, p = .693, d = -0.27$ ). Similar as for the females, no difference  
390 in time spent on ( $t = -1.69, p = .114, d = -0.85,$  Figure 4D) or on number of episodes in  
391 general activity ( $t = -1.60, p = 0.131, d = -0.80$ ) were found between CTR- and FLX-males.  
392 However, just as FLX-females, FLX-males spent more time walking/running than CTR-males  
393 ( $t = -3.05, p = .045, d = -1.52,$  Figure 4E), but there was no difference in time spent on non-  
394 social exploration ( $t = 0.06, p = .953, d = 0.03,$  Figure 4F). FLX-males did not differ from  
395 CTR-males in the number of episodes walking/running ( $t = -1.61, p = .130, d = -0.80$ ) or non-  
396 social exploration ( $t = -0.73, p = .786, d = -0.36$ ).

397 We then investigated whether there were differences between CTR- and FLX-rats in  
398 how long it took them to visit all the 10 predefined locations (see Figure 2B) of the

399 seminatural environment. Rats that did not visit all locations within the observation time were  
400 given a score of 3600 (total observation time in seconds). The results indicated that FLX-rats,  
401 both males and females, did not need significantly more or less time to visit all locations than  
402 CTR-rats (females:  $t = 1.33 = p = .212, d = 0.42$ ; males:  $t = -1.15, p = .271, d = -0.57$ ). We  
403 thereafter investigated how many locations the rats visited as a function of time  
404 (1/3/5/10/20/30/60 minutes), measured on cumulative data. FLX-females were not  
405 significantly faster at visiting the different locations compared to CTR-females (Figure 4G),  
406 but when the different time-points were analyzed separately, they seem to have visited  
407 significantly more locations within the first 3 minutes ( $t = -2.46, p = .027, d = -1.23$ )  
408 compared to CTR-females. No difference in the number of locations visited (treatment effect:  
409  $F(1,14) = 3.43, p = .085$ ) or in the pattern (time x treatment:  $F(2.64, 36.97) = 0.39, p = .735$ )  
410 over time were found between the CTR- and FLX-males (Figure 4H).

411

### 412 **3.2.2 Other non-social behaviors**

413 We also looked at other relevant non-social behaviors, including non-socially passive  
414 behaviors. The analysis revealed that there was no significant difference between CTR- and  
415 FLX-females in time spent on ( $U = 28.00, z = -0.42, p = .721, r = -0.11$ ) or in the number of  
416 non-socially passive behaviors ( $t = -0.12, p = .903, d = -0.06$ ). Similarly, for the male groups,  
417 no significant difference was found for time spent on ( $t = 1.62, p = .127, d = 0.81$ ) or in the  
418 number of non-socially passive behaviors ( $t = 0.62, p = .546, d = 0.31$ )

419 Next, we investigated whether CTR- and FLX-rats showed different level of  
420 anxiety/stress-related behaviors. The results revealed no significant difference between CTR-  
421 and FLX-rats for time spent on (females:  $t = 1.67, p = .195, d = 0.84$ ; males:  $U = 37.00, z =$   
422  $0.53, p = .806, r = .13$ ) or in the number of episodes (females:  $t = 0.58, p = .693, d = 0.29$ ;

## FLUOXETINE EXPOSURE AND INVESTIGATION BEHAVIORS

21

423 males:  $t = -0.60$ ,  $p = .860$ ,  $d = -0.30$ ) self-grooming. When investigating the total time in the  
424 open area, no significant difference was found between CTR- and FLX-rats (females:  $t = -$   
425  $1.39$ ,  $p = .186$ ,  $d = -0.70$ ; males:  $t = -0.98$ ,  $p = .345$ ,  $d = -0.49$ ). Similarly, the treatment groups  
426 did not differ on the total time spent in the burrow area (females:  $t = 1.57$ ,  $p = .138$ ,  $d = 0.79$ ;  
427 males:  $t = 1.02$ ,  $p = .323$ ,  $d = 0.51$ ).

428

429

430 **Figure 4 Non-social behaviors in females and males**

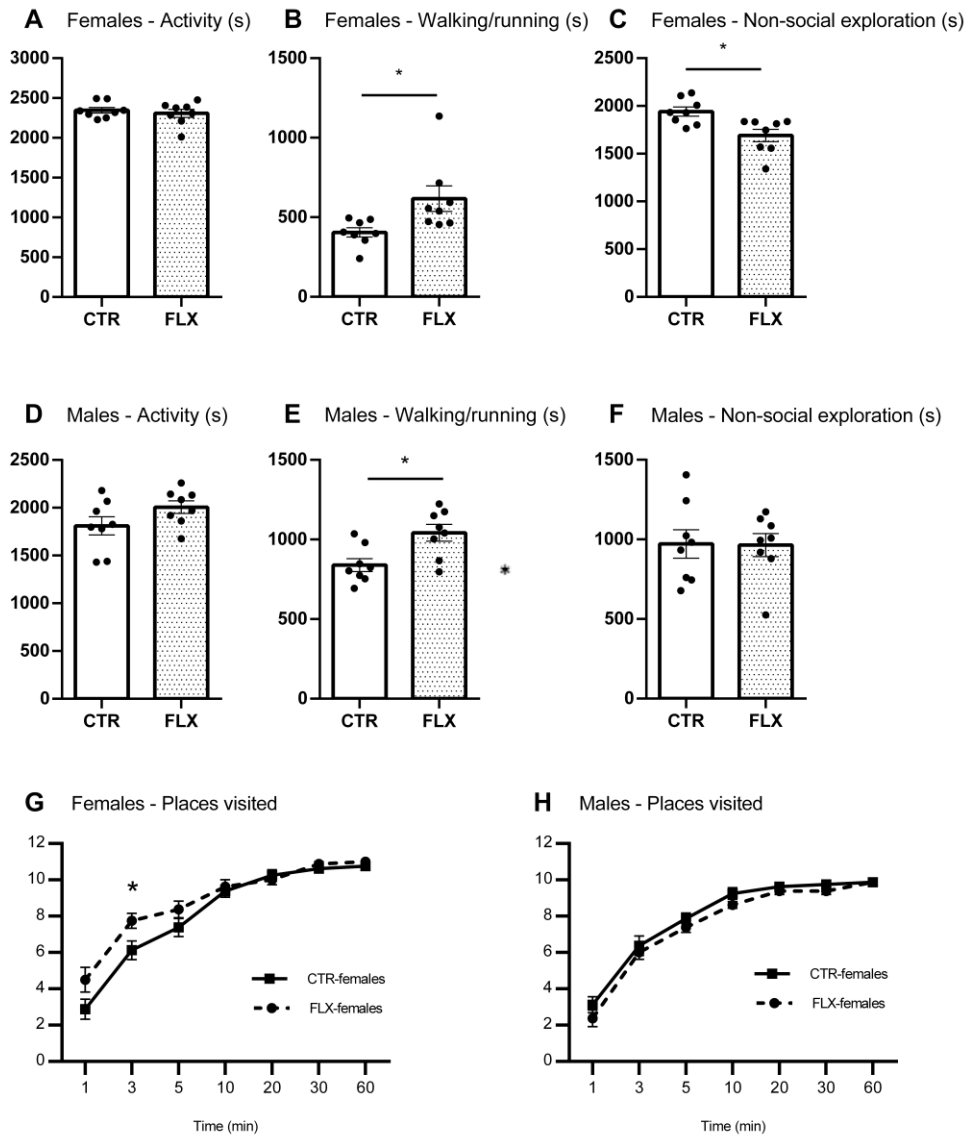

431

432 *Figure 4. The data represent the time spent (s) on general activity (A, D), walking/running (B,*

433 *E), non-social exploration (C, F), and the total number of places in the SNE visited over time*

434 *(G, H). All graphs show comparisons between CTR-females (n = 8) and FLX-females (n = 8)*

435 *or between CTR-males (n = 8) and FLX-males (n = 8). Data are shown with individual data*

436 *points with bars representing the group means (A-F), or with squares and circles*

437 *representing respective group means (G-H). Error bars are representing SEM.*

438 *\*p < 0.05*

439 **3.3 Fluoxetine exposure does not influence how the rats adapt to a novel environment**

440 Finally, we were interested to see whether the treatment groups adapted differently to  
441 the novel physical and social environment, and thus, whether the differences in behavior  
442 between the groups were stable over time. We therefore divided the dataset into six 10-  
443 minutes time-bins and assessed the differences between CTR- and FLX-rats on social and  
444 non-social behaviors over the course of the observation period.

445

446 **3.3.1 Social investigation behaviors**

447 The repeated measure analysis revealed that FLX-females and FLX-males did not  
448 show a significantly different pattern of time spent on socially active behaviors, compared to  
449 CTR-females (time-bin x treatment:  $F(5,70) = 0.26, p = .932, \eta_p^2 = .02$ , Figure 5A) or CTR-  
450 males (time-bin x treatment:  $F(5,70) = 0.51, p = .765, \eta_p^2 = .04$ , Figure 5B) respectively.  
451 Similarly, when looking at the frequency of socially active behaviors, no interaction between  
452 time-bin and treatment was found for female ( $F(5,70) = 0.63, p = .675, \eta_p^2 = .04$ ) or male rats  
453 ( $F(5,70) = 0.99, p = .431, \eta_p^2 = .07$ ).

454

455 **3.3.2 Non-social investigation behaviors**

456 For time spent on walking/running, no differences as a function of time were found  
457 between the CTR- and FLX-rats for females ( $F(5,70) = 0.63, p = .679, \eta_p^2 = .04$ ) or males  
458 ( $F(2.64, 36.92) = 0.69, p = .634, \eta_p^2 = .05$ ), meaning that the increase in walking/running was  
459 present during the whole course of the hour and was most pronounced during the first 10- ( $t =$   
460  $-2.77, p = .015, d = -1.38$ ) and 30-minutes ( $U = 59.00, z = 2.84, p = .003, r = .71$ ) in FLX-  
461 females, and during the first 40- ( $t = -3.58, p = .003, d = -1.79$ ) and 50-minutes ( $t = -2.56, p =$   
462  $.023, d = -1.28$ ) in FLX-males, compared to CTR-animals. Similar results were found when

463 analyzing the frequency of walking/running (females:  $F(5,70) = 0.88, p = .498, \eta_p^2 = .06$ ;  
464 males:  $F(2.85, 39.88) = 0.82, p = .483, \eta_p^2 = .06$ ). In term of non-social exploration, neither  
465 FLX-females ( $F(5,70) = 0.84, p = .529, \eta_p^2 = .06$ ) nor FLX-males ( $F(2.87, 40.20) = 0.47, p =$   
466  $.697, \eta_p^2 = .03$ ) showed a significant different pattern of time spent on exploration compared  
467 to their control group. Thus, FLX-males did not differ from CTR-males throughout the  
468 different time points during the observation period. FLX-females other the other hand, scored  
469 lower than CTR-females during the whole hour, but most prominently in the first 10- ( $t =$   
470  $3.03, p = .009, d = 1.52$ ), 20- ( $t = 4.38, p < .001, d = 2.19$ ) and 30- minutes ( $U = 12.00, z = -$   
471  $2.10, p = .038, r = -.53$ ). Similar results were revealed for the frequency of non-social  
472 exploration (females:  $F(5,70) = 0.23, p = .948, \eta_p^2 = .02$ ; males:  $F(5,70) = 1.76, p = .132, \eta_p^2$   
473  $= .11$ ).

474

### 475 **3.3.3 Other social and non-social behaviors**

476 CTR- and FLX-rats showed no significant difference in pattern of time spent on  
477 (females: time-bin x treatment:  $F(1.21, 16.87) = 0.17, p = .729, \eta_p^2 = .01$ ; males: time-bin x  
478 treatment:  $F(1.89, 26.42) = 1.05, p = .361, \eta_p^2 = .07$ ) and number of (females: time-bin x  
479 treatment: :  $F(1.72, 24,12) = 0.41, p = .636, \eta_p^2 = .03$ ; males: time-bin x treatment:  $F(2.04,$   
480  $28.58) = 1.01, p = .378, \eta_p^2 = .07$ ) socially passive behaviors. Neither did they show any  
481 significant difference in pattern of time spent on (females: time-bin x treatment:  $F(5,70) =$   
482  $1.49, p = .204, \eta_p^2 = .10$ ; males: time-bin x treatment:  $F(1.99, 27.88) = 0.98, p = .388, \eta_p^2 =$   
483  $.07$ ) or number of (females: time-bin x treatment:  $F(5,70) = 0.63, p = .680, \eta_p^2 = .04$ ; males:  
484 time-bin x treatment:  $F(1.92, 26.84) = 0.77, p = .468, \eta_p^2 = .05$ ) conflict behaviors. However,  
485 when analyzing the data non-linearly, a cubic interaction effect for the females group  
486 indicated that when one group scored higher, the other scored lower ( $F(1, 14) = 5.71, p =$



FLUOXETINE EXPOSURE AND INVESTIGATION BEHAVIORS

25

487 .031,  $\eta_p^2 = .29$ ). For non-socially passive behaviors, no significant difference as a function of  
488 time were found for females (duration: time-bin x treatment:  $F(2.23, 31.14) = 0.26, p = .795,$   
489  $\eta_p^2 = .02$ ; frequency: time-bin x treatment:  $F(2.64, 36.99) = 0.18, p = .889, \eta_p^2 = .01$ ) and  
490 males (duration: time-bin x treatment:  $F(2.33, 32.62) = 0.58, p = .592, \eta_p^2 = .04$ ; frequency:  
491 time-bin x treatment:  $F(2.56, 35.90) = 0.51, p = .649, \eta_p^2 = .04$ ).

492

493

494 **Figure 5 Social and non-social investigation behaviors measured as a function of time.**

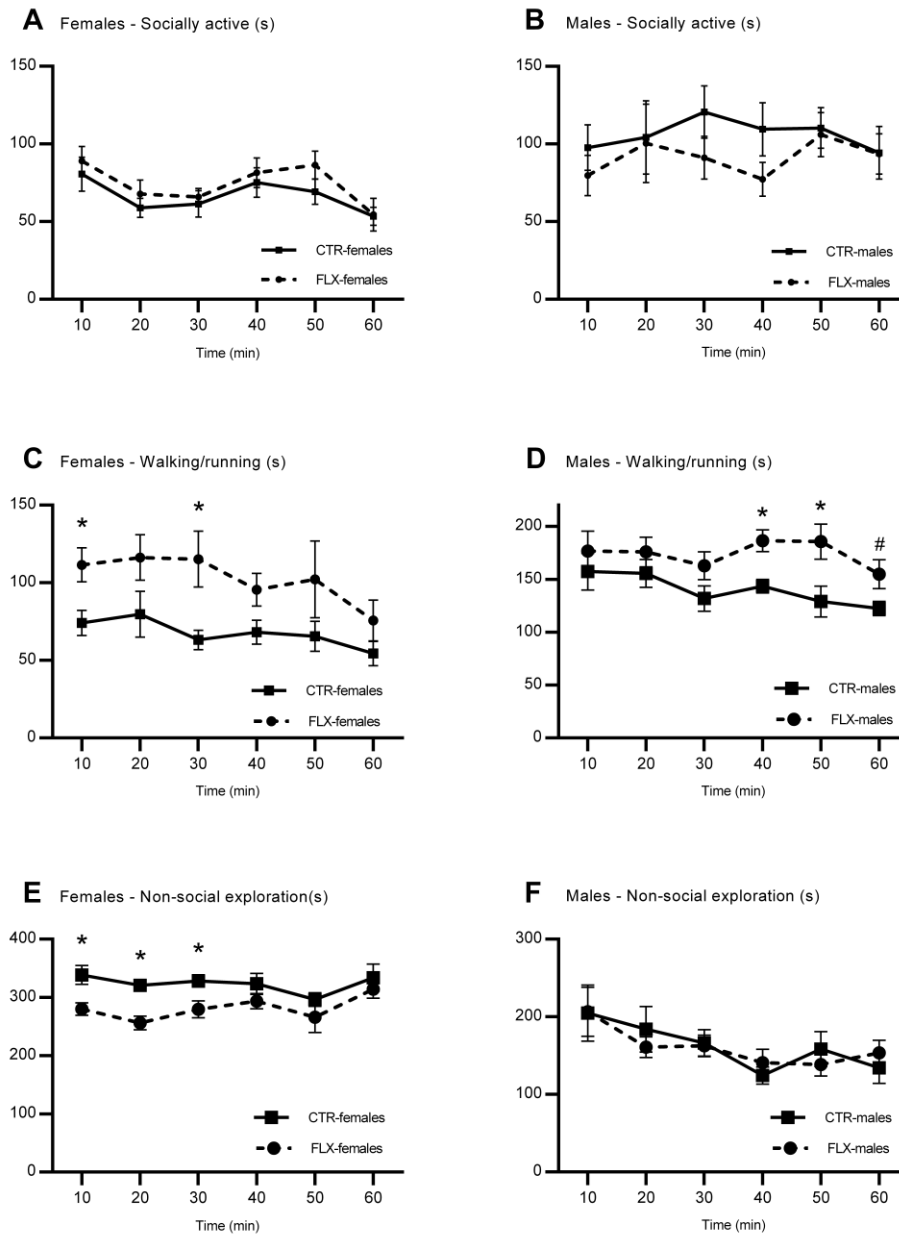

495  
496 *Figure 5. The data represent the time spent (s) on different behaviors as a function of time*  
497 *measured every 10 minutes. The graphs show socially active behaviors (A, B),*  
498 *walking/running (C, D), and non-social exploration (E, F). All graphs show comparisons*  
499 *between CTR-females (n = 8) and FLX-females (n = 8) or between CTR-males (n = 8) and*  
500 *FLX-males (n = 8). Squares and circles represent respective group means, error bars*  
501 *representing  $\pm$  SEM. \* $p < 0.05$ , # $p < 0.06$*

502 **4. Discussion**

503 In our study, we investigated how perinatal fluoxetine exposure affects adult social  
504 and non-social investigation behaviors in a novel seminatural environment with unfamiliar  
505 conspecifics. Our findings show that perinatal fluoxetine exposure does not induce alterations  
506 on social investigation behaviors and strategies when introduced to a novel seminatural  
507 environment and unknown conspecifics. However, perinatal fluoxetine exposure was found to  
508 affect non-social investigation behaviors. More specifically, perinatal fluoxetine exposed  
509 female and male rats showed increased locomotor activity (in terms of walking/running),  
510 while perinatal fluoxetine exposed females showed decreased non-social exploration.  
511 Furthermore, it was demonstrated that the observed differences maintained throughout the  
512 whole observation.

513

514 **4.1 Social behaviors**

515 The first question we investigated was whether social investigation behaviors,  
516 operationalized as active social behaviors (sniffing and grooming other rats) and latency to  
517 meet all other colony members, would be affected by perinatal SSRI exposure. The ability to  
518 interact in line with social norms is crucial in everyday life, and deviant social behavior in the  
519 initial phase of contact can make it difficult to establish social relationships. The results in  
520 this study revealed no differences between CTR- and FLX-rats on the total time spent on, or  
521 the number of, active social behaviors. Previous findings from our research group showed that  
522 FLX-females, but not FLX-males, showed a tendency toward decreased active social  
523 behaviors (Houwing et al., 2019a), which was not present after naturally occurring aggressive  
524 encounters. Nevertheless, in those studies, behaviors were observed after the rats had already  
525 been housed together in the seminatural environment for several days, and thus were familiar

526 with each other. The effect of fluoxetine on social behaviors might have different outcomes  
527 depending on whether the rats are interacting with familiar or unfamiliar partners (Gemmell et  
528 al., 2019). In the present study, the rats were observed during the first hour after introduction  
529 to the seminatural environment, allowing us to investigate how the rats encounter the first  
530 social situations before knowing each other.

531 We also measured how long it took the rats to meet the other colony members after  
532 being introduced to the novel environment. Such latency times could indicate whether the rats  
533 have different interests in approaching other rats. Lack of social interest is a relevant trait to  
534 examine since such symptoms commonly appear in various mental and neurodevelopmental  
535 disorders (Barkus and Badcock, 2019). However, the results did not reveal any differences in  
536 latencies to meet conspecifics between CTR- and FLX-rats. From our findings, we conclude  
537 that perinatal SSRI exposure does not affect social investigation behavior and strategies  
538 during the first hour after introduction to a novel environment with unfamiliar conspecifics.  
539 Therefore, we suggest that the effect of perinatal SSRI exposure on social behaviors might be  
540 dependent on the degree of familiarity between the rats. Although, the differences in results  
541 could also have been caused by an altered interest in exploring the environment leading to  
542 reduced social interactions.

543 We further investigated whether SSRI exposure leads to behavioral alterations in other  
544 aspects of social behaviors, such as social passive behaviors and conflict behaviors. The  
545 results revealed no difference in passive social behavior between FLX-rats and CTR-rats.  
546 Furthermore, neither FLX-females nor FLX-males differed from CTR-rats in terms of conflict  
547 behavior. However, conflict behavior was not frequently occurring in our experiment. The  
548 Wistar strain is generally known to exhibit little aggressive behavior compared to other strains

549 (Koolhaas et al., 2013). In addition, the experiment was not designed to trigger aggressive  
550 behavior as competition for food, water or mating partners were not necessary.

551

#### 552 **4.2 Non-social behaviors**

553         Next, we investigated whether perinatal SSRI exposure would affect non-social  
554 investigation behaviors, operationalized as locomotor activity (walking/running), non-social  
555 exploration and latency to visit all locations of the environment. We found that both FLX-  
556 females and FLX-males spent more time on locomotor activity compared to control rats.  
557 FLX-females also had more episodes with locomotor activity compared to CTR-females. In  
558 addition, FLX-females visited more locations of the seminatural environment within the first  
559 3 minutes after entrance compared to CTR-females. Together, this could indicate that  
560 perinatal SSRI exposure leads to an increased interest to investigate paths and locations.  
561 Contrary to our findings, a recent meta-analysis found evidence for *reduced* activity in  
562 developmentally SSRI exposed rats, as mostly measured by total distance moved (Ramsteijn  
563 et al., 2020). Although we did not measure total distance per se, it is reasonable to assume that  
564 total distance is related to total time spent walking/running in the seminatural environment.  
565 Nevertheless, the meta-analysis is mainly based on studies measuring activity in simplified  
566 open field boxes. Such set-ups allow the rats to perceive the whole environment without  
567 necessarily having to move their bodies. We could therefore assume that an increased interest  
568 to investigate locations and paths would only be observable in situations where  
569 walking/running (movement) is needed to investigate the environment. In addition, in the  
570 current environment, more rats were present leading to the assumption that the odors and  
571 sounds from others may also elicit extra movement, making our set-up more reliable to study  
572 the effects of perinatal fluoxetine exposure on a measure as locomotor activity reflecting

573 alterations in interest to investigate novel paths and locations. With this in mind, we would  
574 expect the differences between FLX- and CTR-rats to disappear (or diminish) when the  
575 animals get familiar with their surroundings and conspecifics. Interestingly, previous studies  
576 from our research group did indeed find no differences on locomotor activity between FLX-  
577 and CTR- rats after the rats were already familiarized with the environment (Heinla et al.,  
578 2020; Houwing et al., 2019a). This suggests that the current findings of increased locomotor  
579 activity in FLX-rats are related to the introduction to a novel environment, and not the  
580 complexity of the environment on itself.

581         We also found that FLX-females, but not FLX-males, spent less time on non-social  
582 exploration than control rats, meaning they were sniffing less on objects (e.g. shelters,  
583 wooden sticks) and specific elements in the environment (e.g. walls, the ground). This is in  
584 line with previous findings from day 4 and day 7 in the same experiment (Houwing et al.,  
585 2019a), where reduced non-social exploration was found in FLX-females, but not in FLX-  
586 males. Other studies have also reported reduced non-social explorative behaviors in SSRI  
587 exposed rats (Ansorge et al., 2004; Karpova et al., 2009; Rebello et al., 2014; Sarkar et al.,  
588 2014; Simpson et al., 2011; Zohar et al., 2016). Although we have shown that FLX-females  
589 seem to have increased interest to explore paths and locations, shown by increased locomotor  
590 activity, our findings also indicate that perinatal SSRI exposure in females leads to reduced  
591 interest to investigate objects and other specific elements in the environment. Although the  
592 findings might seem contradictory at first sight, locomotor activity and non-social exploration  
593 could possibly serve different purposes. As locomotor activity could measure the interest to  
594 get quickly familiar with the whole environment as a kind of screening behavior, non-social  
595 exploration reflects a more detailed and accurate investigation of the environment. Therefore,

596 we suggest that perinatal SSRI exposure alters the strategy the animals use to investigate a  
597 novel environment leading to a quicker, but less detailed investigation of novel environments.

598 We further investigated other non-social behaviors such as anxiety/stress-related  
599 behaviors. We did not find any difference between CTR- and FLX-rats on anxiety/stress-  
600 related behaviors. A previous study found that white-noise exposure induced increased self-  
601 grooming in FLX-males (Houwing et al., 2019a), which was explained as an altered stress-  
602 coping behavior. As introduction to a new environment can be considered a stressful  
603 situation, we expected to observe a similar increase in self-grooming behavior in FLX-males  
604 in the present study. However, no differences were found between CTR- and FLX- rats on  
605 self-grooming behavior. Moreover, no differences were found on the amount of time spent in  
606 the open area, as measure for changes in anxiety-related behavior. Altogether, this makes us  
607 to conclude that perinatal SSRI exposure does not affect anxiety/stress-related behavior  
608 during the first hour of exposure to a novel environment with unfamiliar conspecifics.

609

#### 610 **4.3 Behavioral adaption over time**

611 The last question we investigated was whether perinatal SSRI exposed rats adapt  
612 differently to unfamiliarity (both environmental and socially) than their non-exposed  
613 conspecifics. Therefore, we split the observational data into six 10-minute time-bins in order  
614 to look at behavioral changes over time. As part of the familiarization process to a new  
615 environment, we generally expected to see adjustments in behavior during the first hour, such  
616 as decrease in general activity (Wilkinson et al., 2006). However, our main subject of interest  
617 was whether perinatal SSRI exposed rats adjusted their behavior in a different manner than  
618 controls.

619 Our results revealed that SSRI exposed animals adapted similarly to the novel  
620 environment as control animals. As discussed, FLX-females spent less time exploring objects  
621 and the physical environment, whereas both FLX-males and FLX-females spent more time on  
622 locomotor activity compared to CTR-rats. Those differences remained relatively stable  
623 throughout the first hour, meaning that FLX- and CTR- rats behaved differently, but adapted  
624 similarly to the novel environment over time (the increased locomotor activity remained  
625 higher during the full course of the observed hour). Interestingly, the differences in locomotor  
626 activity and non-social exploration in FLX-females was mostly pronounced during the first 30  
627 minutes, while the FLX-males had more increased locomotor activity during the last 30  
628 minutes. The reason for this remains unclear, but since our experiment employed a reversed  
629 dark/light cycle in which the light conditions gradually decreased from daylight to moonlight  
630 between 10.30 and 11.00 every morning, and the rats thus experienced the shift from light to  
631 darkness during the first hour, this could have resulted in sex-specific alterations on  
632 behavioral adjustment to light between male and female rats. However, future experiments are  
633 needed before further conclusions can be drawn.

634 We conclude that perinatal fluoxetine exposed rats do not adapt their behaviors  
635 differently than controls during the first hour after introduction to the novel environment,  
636 instead the changes in non-social investigation behavior remain stable over time.

637

## 638 **5. Conclusion**

639 In summary, our data show that perinatal SSRI exposure alters aspects of non-social  
640 investigation behaviors when introduced to a novel environment with unfamiliar conspecifics,  
641 but did not alter social investigation behaviors. Both FLX-males and FLX-females showed a  
642 higher amount of locomotor activity, while FLX-females visited more locations within the



643 first three minutes, and spent less time exploring objects and specific elements in the physical  
644 environment. Perinatal fluoxetine exposure did not affect social behavior or how the animals  
645 adapted to the unfamiliar seminatural environment over time. Altogether, we conclude that  
646 perinatal SSRI exposure alters non-social investigation, to a quicker and less detailed strategy,  
647 when exposed to a novel environment, and that the alteration is most pronounced in females.

648

649 **Acknowledgements**

650 Financial support was received from Helse Nord #PFP1295-16, Norway. We also  
651 would like to thank Ragnhild Osnes, Carina Sørensen, Nina Løvhaug, Katrine Harjo, and  
652 Remi Osnes for their excellent care of the animals.

## References

- Andrade, S.E., Raebel, M.A., Brown, J., Lane, K., Livingston, J., Boudreau, D., Rolnick, S.J., Roblin, D., Smith, D.H., Willy, M.E., Staffa, J.A., Platt, R., 2008. Use of antidepressant medications during pregnancy: A multisite study. *American journal of obstetrics and gynecology* 198.
- Ansorge, M.S., Zhou, M., Lira, A., Hen, R., Gingrich, J.A., 2004. Early-life blockade of the 5-HT transporter alters emotional behavior in adult mice. *Science* 306, 879-881.
- Azmitia, E.C., 2001. Modern views on an ancient chemical: Serotonin effects on cell proliferation, maturation, and apoptosis. *Brain Res Bull* 56, 413-424.
- Barkus, E., Badcock, J.C., 2019. A transdiagnostic perspective on social anhedonia. *Front Psychiatry* 10, 216.
- Bennett, H.A., Einarson, A., Taddio, A., Koren, G., Einarson, T.R., 2004. Prevalence of depression during pregnancy: Systematic review. *Obstet Gynecol* 103, 698-709.
- Brown, A.S., Gyllenberg, D., Malm, H., McKeague, I.W., Hinkka-Yli-Salomaki, S., Artama, M., Gissler, M., Cheslack-Postava, K., Weissman, M.M., Gingrich, J.A., Sourander, A., 2016. Association of selective serotonin reuptake inhibitor exposure during pregnancy with speech, scholastic, and motor disorders in offspring. *JAMA Psychiatry* 73, 1163-1170.
- Charlton, R.A., Jordan, S., Pierini, A., Garne, E., Neville, A.J., Hansen, A.V., Gini, R., Thayer, D., Tingay, K., Puccini, A., Bos, H.J., Nybo Andersen, A.M., Sinclair, M., Dolk, H., de Jong-van den Berg, L.T., 2015. Selective serotonin reuptake inhibitor prescribing before, during and after pregnancy: A population-based study in six european regions. *BJOG* 122, 1010-1020.
- Chu, X., Agmo, A., 2014. Sociosexual behaviours in cycling, intact female rats (*rattus norvegicus*) housed in a seminatural environment. *Behaviour* 151, 1143-1184.
- Dunkel Schetter, C., 2011. Psychological science on pregnancy: Stress processes, biopsychosocial models, and emerging research issues. *Annu Rev Psychol* 62, 531-558.
- El Marroun, H., White, T., Verhulst, F.C., Tiemeier, H., 2014. Maternal use of antidepressant or anxiolytic medication during pregnancy and childhood neurodevelopmental outcomes: A systematic review. *Eur Child Adolesc Psychiatry* 23, 973-992.
- Gaspar, P., Cases, O., Maroteaux, L., 2003. The developmental role of serotonin: News from mouse molecular genetics. *Nat Rev Neurosci* 4, 1002-1012.

Gemmel, M., De Lacalle, S., Mort, S.C., Hill, L.A., Charlier, T.D., Pawluski, J.L., 2019.

Perinatal fluoxetine has enduring sexually differentiated effects on neurobehavioral outcomes related to social behaviors. *Neuropharmacology* 144, 70-81.

Gemmel, M., Hazlett, M., Bogi, E., De Lacalle, S., Hill, L.A., Kokras, N., Hammond, G.L., Dalla, C., Charlier, T.D., Pawluski, J.L., 2017. Perinatal fluoxetine effects on social play, the hpa system, and hippocampal plasticity in pre-adolescent male and female rats: Interactions with pre-gestational maternal stress. *Psychoneuroendocrinology* 84, 159-171.

Glover, M.E., Clinton, S.M., 2016. Of rodents and humans: A comparative review of the neurobehavioral effects of early life ssri exposure in preclinical and clinical research. *Int J Dev Neurosci* 51, 50-72.

Goodman, S.H., 2007. Depression in mothers. *Annu Rev Clin Psychol* 3, 107-135.

Hegstad, J., Huijgens, P.T., Houwing, D.J., Olivier, J.D.A., Heijkoop, R., Snoeren, E.M.S., 2020. Female rat sexual behavior is unaffected by perinatal fluoxetine exposure. *Psychoneuroendocrinology* 120, 104796.

Heinla, I., Heijkoop, R., Houwing, D.J., Olivier, J.D.A., Snoeren, E.M.S., 2020. Third-party prosocial behavior in adult female rats is impaired after perinatal fluoxetine exposure. *Physiology & behavior* 222, 112899.

Hermansen, T.K., Roysamb, E., Augusti, E.M., Melinder, A., 2016. Behavior and inhibitory control in children with prenatal exposure to antidepressants and medically untreated depression. *Psychopharmacology* 233, 1523-1535.

Houwing, D.J., Esquivel-Franco, D.C., Ramsteijn, A.S., Schuttel, K., Struik, E.L., Arling, C., de Boer, S.F., Olivier, J.D.A., 2020. Perinatal fluoxetine treatment and dams' early life stress history have opposite effects on aggressive behavior while having little impact on sexual behavior of male rat offspring. *Psychopharmacology* 237, 2589-2600.

Houwing, D.J., Heijkoop, R., Olivier, J.D.A., Snoeren, E.M.S., 2019a. Perinatal fluoxetine exposure changes social and stress-coping behavior in adult rats housed in a seminatural environment. *Neuropharmacology* 151, 84-97.

Houwing, D.J., Staal, L., Swart, J.M., Ramsteijn, A.S., Wahr, M., de Boer, S.F., Olivier, J.D.A., 2019b. Subjecting dams to early life stress and perinatal fluoxetine treatment differentially alters social behavior in young and adult rat offspring. *Front Neurosci* 13, 229.

Karpova, N.N., Lindholm, J., Pruunsild, P., Timmusk, T., Castren, E., 2009. Long-lasting behavioural and molecular alterations induced by early postnatal fluoxetine exposure are

restored by chronic fluoxetine treatment in adult mice. *Eur Neuropsychopharmacol* 19, 97-108.

Khatri, N., Simpson, K.L., Lin, R.C., Paul, I.A., 2014. Lasting neurobehavioral abnormalities in rats after neonatal activation of serotonin 1a and 1b receptors: Possible mechanisms for serotonin dysfunction in autistic spectrum disorders. *Psychopharmacology* 231, 1191-1200.

Kim, J., Riggs, K.W., Misri, S., Kent, N., Oberlander, T.F., Grunau, R.E., Fitzgerald, C., Rurak, D.W., 2006. Stereoselective disposition of fluoxetine and norfluoxetine during pregnancy and breast-feeding. *Br J Clin Pharmacol* 61, 155-163.

Kiryanova, V., Dyck, R.H., 2014. Increased aggression, improved spatial memory, and reduced anxiety-like behaviour in adult male mice exposed to fluoxetine early in life. *Dev Neurosci* 36, 396-408.

Klinger, G., Frankenthal, D., Merlob, P., Diamond, G., Sirota, L., Levinson-Castiel, R., Linder, N., Stahl, B., Inbar, D., 2011. Long-term outcome following selective serotonin reuptake inhibitor induced neonatal abstinence syndrome. *J Perinatol* 31, 615-620.

Koolhaas, J.M., Coppens, C.M., de Boer, S.F., Buwalda, B., Meerlo, P., Timmermans, P.J., 2013. The resident-intruder paradigm: A standardized test for aggression, violence and social stress. *J Vis Exp*, e4367.

Kristensen, J.H., Ilett, K.F., Hackett, L.P., Yapp, P., Paech, M., Begg, E.J., 1999. Distribution and excretion of fluoxetine and norfluoxetine in human milk. *Br J Clin Pharmacol* 48, 521-527.

Lundmark, J., Reis, M., Bengtsson, F., 2001. Serum concentrations of fluoxetine in the clinical treatment setting. *Ther Drug Monit* 23, 139-147.

Lupattelli, A., Wood, M., Ystrom, E., Skurtveit, S., Handal, M., Nordeng, H., 2018. Effect of time-dependent selective serotonin reuptake inhibitor antidepressants during pregnancy on behavioral, emotional, and social development in preschool-aged children. *J Am Acad Child Adolesc Psychiatry* 57, 200-208.

Malm, H., Brown, A.S., Gissler, M., Gyllenberg, D., Hinkka-Yli-Salomaki, S., McKeague, I.W., Weissman, M., Wickramaratne, P., Artama, M., Gingrich, J.A., Sourander, A., 2016. Gestational exposure to selective serotonin reuptake inhibitors and offspring psychiatric disorders: A national register-based study. *J Am Acad Child Adolesc Psychiatry* 55, 359-366.

- Mitchell, A.A., Gilboa, S.M., Werler, M.M., Kelley, K.E., Louik, C., Hernandez-Diaz, S., Stud, N.B.D.P., 2011. Medication use during pregnancy, with particular focus on prescription drugs: 1976-2008. *American journal of obstetrics and gynecology* 205.
- Molenaar, N.M., Bais, B., Lambregtse-van den Berg, M.P., Mulder, C.L., Howell, E.A., Fox, N.S., Rommel, A.S., Bergink, V., Kamperman, A.M., 2020. The international prevalence of antidepressant use before, during, and after pregnancy: A systematic review and meta-analysis of timing, type of prescriptions and geographical variability. *Journal of Affective Disorders* 264, 82-89.
- Muller, C.L., Anacker, A.M.J., Veenstra-VanderWeele, J., 2016. The serotonin system in autism spectrum disorder: From biomarker to animal models. *Neuroscience* 321, 24-41.
- Noorlander, C.W., Ververs, F.F., Nikkels, P.G., van Echteld, C.J., Visser, G.H., Smidt, M.P., 2008. Modulation of serotonin transporter function during fetal development causes dilated heart cardiomyopathy and lifelong behavioral abnormalities. *PLoS One* 3, e2782.
- Olivier, J.D., Blom, T., Arentsen, T., Homberg, J.R., 2011a. The age-dependent effects of selective serotonin reuptake inhibitors in humans and rodents: A review. *Prog Neuropsychopharmacol Biol Psychiatry* 35, 1400-1408.
- Olivier, J.D., Valles, A., van Heesch, F., Afrasiab-Middelmann, A., Roelofs, J.J., Jonkers, M., Peeters, E.J., Korte-Bouws, G.A., Dederen, J.P., Kiliaan, A.J., Martens, G.J., Schubert, D., Homberg, J.R., 2011b. Fluoxetine administration to pregnant rats increases anxiety-related behavior in the offspring. *Psychopharmacology* 217, 419-432.
- Rampono, J., Proud, S., Hackett, L.P., Kristensen, J.H., Ilett, K.F., 2004. A pilot study of newer antidepressant concentrations in cord and maternal serum and possible effects in the neonate. *Int J Neuropsychopharmacol* 7, 329-334.
- Ramsteijn, A.S., Van de Wijer, L., Rando, J., van Luijk, J., Homberg, J.R., Olivier, J.D.A., 2020. Perinatal selective serotonin reuptake inhibitor exposure and behavioral outcomes: A systematic review and meta-analyses of animal studies. *Neurosci Biobehav Rev* 114, 53-69.
- Rebello, T.J., Yu, Q., Goodfellow, N.M., Caffrey Cagliostro, M.K., Teissier, A., Morelli, E., Demireva, E.Y., Chemiakine, A., Rosoklija, G.B., Dwork, A.J., Lambe, E.K., Gingrich, J.A., Ansorge, M.S., 2014. Postnatal day 2 to 11 constitutes a 5-HT-sensitive period impacting adult mPFC function. *J Neurosci* 34, 12379-12393.
- Rodriguez-Porcel, F., Green, D., Khatry, N., Harris, S.S., May, W.L., Lin, R.C., Paul, I.A., 2011. Neonatal exposure of rats to antidepressants affects behavioral reactions to novelty and

social interactions in a manner analogous to autistic spectrum disorders. *Anat Rec (Hoboken)* 294, 1726-1735.

Sarkar, A., Chachra, P., Vaidya, V.A., 2014. Postnatal fluoxetine-evoked anxiety is prevented by concomitant 5-HT<sub>2A/C</sub> receptor blockade and mimicked by postnatal 5-HT<sub>2A/C</sub> receptor stimulation. *Biol Psychiatry* 76, 858-868.

Simpson, K.L., Weaver, K.J., de Villiers-Sidani, E., Lu, J.Y., Cai, Z., Pang, Y., Rodriguez-Porcel, F., Paul, I.A., Merzenich, M., Lin, R.C., 2011. Perinatal antidepressant exposure alters cortical network function in rodents. *Proceedings of the National Academy of Sciences of the United States of America* 108, 18465-18470.

Snoeren, E.M., Antonio-Cabrera, E., Spiteri, T., Musatov, S., Ogawa, S., Pfaff, D.W., Agmo, A., 2015. Role of oestrogen alpha receptors in sociosexual behaviour in female rats housed in a seminatural environment. *J Neuroendocrinol* 27, 803-818.

Svirsky, N., Levy, S., Avitsur, R., 2016. Prenatal exposure to selective serotonin reuptake inhibitors (SSRI) increases aggression and modulates maternal behavior in offspring mice. *Dev Psychobiol* 58, 71-82.

Wilkinson, J.L., Herrman, L., Palmatier, M.I., Bevins, R.A., 2006. Rats' novel object interaction as a measure of environmental familiarity. *Learning and Motivation* 37, 131-148.

Woody, C.A., Ferrari, A.J., Siskind, D.J., Whiteford, H.A., Harris, M.G., 2017. A systematic review and meta-regression of the prevalence and incidence of perinatal depression. *J Affect Disord* 219, 86-92.

Zimmerberg, B., Germeyan, S.C., 2015. Effects of neonatal fluoxetine exposure on behavior across development in rats selectively bred for an infantile affective trait. *Dev Psychobiol* 57, 141-152.

Zohar, I., Shoham, S., Weinstock, M., 2016. Perinatal citalopram does not prevent the effect of prenatal stress on anxiety, depressive-like behaviour and serotonergic transmission in adult rat offspring. *The European journal of neuroscience* 43, 590-600.
